# Supplementary material for: Standardisation needs for organ on chip devices
Source: Royal Society of Chemistry journal article supplement (doi:10.1039/d1lc00241d), 2021-01-01
Supplement: d1lc00241d1.pdf [file d1lc00241d1.pdf]

## Standardisation needs for Organ on Chip devices

Monica Piergiovanni\*<sup>a</sup>, Sofia B. Leite<sup>a</sup>, Raffaella Corvi<sup>a</sup> and Maurice Whelan<sup>a</sup>

### SUPPLEMENTARY MATERIAL

#### Small molecule adsorption in biomedical research

To understand the scale of the small molecule adsorption issue, we performed an analysis on a database of OoC used for biomedical research in neurodegenerative diseases and respiratory tract diseases<sup>1</sup>. By analysing all small molecules used in 33 papers using OoC devices, more than half of the test compounds have chemical properties that suggest a potential adsorption problem on PDMS (Supplementary Table 1). For these applications, the only solution is to use coatings, selected based on the two organ-specific cell types and microenvironment. For OoC used in respiratory diseases, the most common coatings were type I collagen, fibronectin, fibrothrombin, ECM and SigmaCoat. Fibronectin was also used in the neurodegenerative models, as well as laminin, poly-L-lysine, poly-D-lysine, Poly-L-ornithine, Matrigel or even combinations of these. No other methods are proposed to measure or estimate the amount of test compound acting on the cells, or, conversely, the amount of small molecule bind to the OoC device.

Supplementary Table 1 List of drugs used in OoC devices from biomedical research reports

| Name                              | MW           | Log P | Absorption alert | Organ       |
|-----------------------------------|--------------|-------|------------------|-------------|
| Dizocilpine (MK-801)              | 221.3 g/mol  | 2.8   | Yes              | Neuro       |
| Nicotinamide adenine dinucleotide | 663.43 g/mol | -5.9  | No               | Neuro       |
| 1,9-Pyrazoloanthrone              | 220.23 g/mol | 2.7   | May              | Neuro       |
| DEA NONOate                       | 206.3 g/mol  | nd    | May              | Neuro       |
| Cetuximab                         | 354.3 g/mol  | nd    | May              | Respiratory |
| Gemcitabine                       | 263.2 g/mol  | -1.5  | No               | Respiratory |
| Phenylephrine                     | 167.2 g/mol  | -0.3  | No               | Respiratory |
| Forskolin                         | 410.5 g/mol  | 1     | No               | Respiratory |
| Capecitabine                      | 359.35 g/mol | 0.6   | No               | Respiratory |
| 50-deoxy-5-fluorocytidine         | 246.19 g/mol | -1.7  | No               | Respiratory |
| 5-fluorouracil                    | 130.08 g/mol | -0.9  | No               | Respiratory |
| Paclitaxel                        | 853.9 g/mol  | 2.5   | Yes              | Respiratory |
| Budesonide                        | 430.5 g/mol  | 2.5   | Yes              | Respiratory |
| Rociletinib                       | 555.6 g/mol  | 4     | Yes              | Respiratory |
| Erlotinib                         | 393.4 g/mol  | 3.3   | Yes              | Respiratory |
| MK-2206                           | 407.5 g/mol  | 3     | Yes              | Respiratory |
| AZD-0530                          | 542 g/mol    | 4.1   | Yes              | Respiratory |
| A83-01                            | 421.5 g/mol  | 5     | Yes              | Respiratory |
| CI-1033                           | 485.9 g/mol  | 3.9   | Yes              | Respiratory |

## Microfluidic pumping systems

**Pumping system.** There are mainly two types of pumps commonly used in biological laboratories working with microfluidics: controlled-volume pumps and pressure controllers.

- Controlled-volume pumps, mainly syringe pumps but also peristaltic pumps, guarantee a constant flow rate, whatever resistance (*i.e.* device) they need to pump against. An obvious drawback, that makes them tricky to use, is that these pumps can generate very high pressure. This can lead to leakage or breaking of the setup, especially in the inlet connections, which are generally the most delicate part of any microfluidic devices.
- Pressure controllers are widely used, thanks to their easiness of use. As the name goes, the pressure controller imposes a pressure at the inlet of the microchannel. Thus, the flow rate that is generated is depending on the specific device that is used and can be extremely variable in time and among replica of the same OoC. It is generally suggested that these controllers be coupled with a flow meter that measures the effective flow rate in real time. More advanced systems also have algorithms that adjust the inlet pressure based on the measured flow rate in a positive feedback loop. This best practice, however, is not always applied to OoC devices, thus affecting the reproducibility of the results.

It is also possible to include in this category the gravity flows, where the fluid is moved due to the different fluid height between an inlet and an outlet reservoir. Besides the considerations on varying hydraulic resistances, these methods also do not guarantee a uniform pressure drop, since the difference in the fluid level in the two reservoirs – and consequently the flow rate in the device – is constantly decreasing in time.

### Reference

1. Hynes, J., Marshall, L., Adcock, I., Novotny, T., Nic, M., Dibusz, K., Gribaldo, L. and Whelan, M., Advanced Non-animal Models in Biomedical Research, EUR 30334 EN, Publications Office of the European Union, Luxembourg, 2020, ISBN 978-92-76-21380-2 (online),978-92-76-21381-9 (print), doi:10.2760/725821 (online),10.2760/52671 (print), JRC118161

## List of existing standards related to OoC

### Supplementary Figure 1

This list groups 87 published standards, originally developed in different fields, that could be related to specific aspects of OoC. The list was drafted by analysing relevant databases and regulations related to the field. Particularly: Commission communication in the framework of the implementation of the following Directives: Medical Devices, *in vitro* Diagnostics (IVD), Machinery, Electromagnetic Compatibility; ASME, IEEE, ASTM and ISO databases. The majority of the standards describe requirements and test methods and can be related to many aspects of OoC technologies and operations. In particular, several existing standards refer to sterilization, pumping system safety and materials characterization. Many standards on specific aspects of OoC device design are widely used in design/prototyping phase (such as needles, connections, syringes) and to define compatibility (like microplate geometry, pitch spacing)

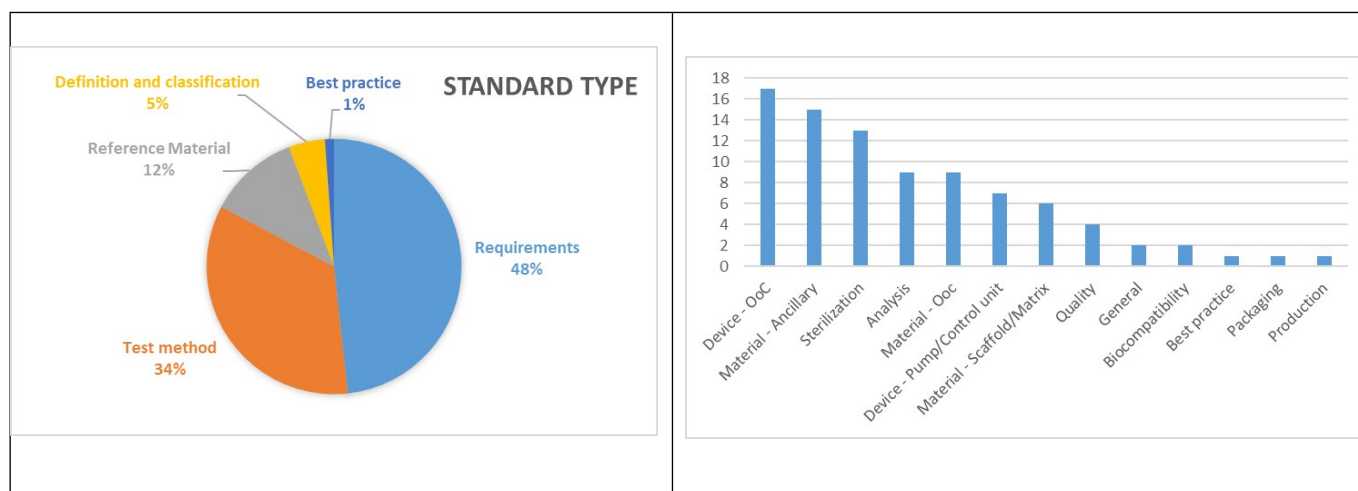

Supplementary Table 2 The following table includes the number and title of the standard, the specific technical committee (TC) that developed it, the standard type and the OoC aspect the standard can relate to.

| Number                   | Title                                                                                                                          | OoC related aspect         | Type                         | Responsible committee        | Year | Note |
|--------------------------|--------------------------------------------------------------------------------------------------------------------------------|----------------------------|------------------------------|------------------------------|------|------|
| ANSI SLAS 1-2004 (R2012) | Microplates – Footprint Dimensions                                                                                             | Device - OoC               | Requirements - compatibility | SLAS Microplate Standards AC | 2012 |      |
| ANSI SLAS 2-2004 (R2012) | Microplates – Height Dimensions                                                                                                | Device - OoC               | Requirements - compatibility | SLAS Microplate Standards AC | 2012 |      |
| ANSI SLAS 3-2004 (R2012) | Microplates – Bottom Outside Flange Dimensions                                                                                 | Device - OoC               | Requirements - compatibility | SLAS Microplate Standards AC | 2012 |      |
| ANSI SLAS 4-2004 (R2012) | Microplates – Well Positions                                                                                                   | Device - OoC               | Requirements - compatibility | SLAS Microplate Standards AC | 2012 |      |
| ANSI SLAS 6-2004 (R2012) | Microplates – Well Bottom Elevation                                                                                            | Device - OoC               | Requirements - compatibility | SLAS Microplate Standards AC | 2012 |      |
| ANSI/ISA-88              | Batch Control Standard (Parts 1-4)                                                                                             | Production                 | Requirements                 | ISA                          | 2010 |      |
| ASME - MFC-1 - 2015      | Glossary of Terms Used in the Measurement of Fluid Flow in Pipes                                                               | Analysis - Flow            | Definition - Vocabulary      | ASME - MFC-1                 | 2015 |      |
| ASME - MFC-11 - 2006     | Measurement of Fluid Flow by Means of Coriolis Mass Flowmeters                                                                 | Analysis - Flow            | Test method                  | ASME - MFC-11                | 2006 |      |
| ASME - MFC-14M - 2003    | Measurement of Fluid Flow Using Small Bore Precision Orifice Meters                                                            | Analysis - Flow            | Test method                  | ASME - MFC-14M               | 2003 |      |
| ASME - MFC-16 - 2014     | Measurement of Liquid Flow in Closed Conduits with Electromagnetic Flowmeters                                                  | Analysis - Flow            | Test method                  | ASME - MFC-16                | 2014 |      |
| ASME - MFC-21.2 - 2010   | Measurement of Fluid Flow by Means of Thermal Dispersion Mass Flowmeters                                                       | Analysis - Flow            | Test method                  | ASME - MFC-21.2              | 2010 |      |
| ASME - MFC-5.1 - 2011    | Measurement of Liquid Flow in Closed Conduits Using Transit-Time Ultrasonic Flowmeters                                         | Analysis - Flow            | Test method                  | ASME - MFC-5.1               | 2011 |      |
| ASME - PTC 19.5 - 2004   | Flow Measurement                                                                                                               | Analysis - Flow            | Test method                  | ASME - PTC 19.5              | 2004 |      |
| ASTM - F2038 – 18        | Standard Guide for Silicone Elastomers, Gels, and Foams Used in Medical Applications Part I—Formulations and Uncured Materials | Material - Ooc             | Requirements                 | ASTM F04.12                  | 2019 |      |
| ASTM - F2042 – 18        | Standard Guide for Silicone Elastomers, Gels, and Foams Used in Medical Applications Part II—Crosslinking and Fabrication      | Material - Ooc             | Requirements                 | ASTM F04.11                  | 2018 |      |
| ASTM F2027 - 16          | Standard Guide for Characterization and Testing of Raw or Starting Materials for Tissue-Engineered Medical Products            | Material - Scaffold/Matrix | Test method                  | ASTM - F04.42                | 2016 | TEMP |

## ARTICLE

## Journal Name

|                        |                                                                                                                                                                           |                            |                         |               |      |      |
|------------------------|---------------------------------------------------------------------------------------------------------------------------------------------------------------------------|----------------------------|-------------------------|---------------|------|------|
| ASTM F2064 - 17        | Standard Guide for Characterization and Testing of Alginates as Starting Materials Intended for Use in Biomedical and Tissue Engineered Medical Product Applications      | material - Scaffold/Matrix | Test method             | ASTM - F04.42 | 2017 | TEMP |
| ASTM F2103 - 18        | Standard Guide for Characterization and Testing of Chitosan Salts as Starting Materials Intended for Use in Biomedical and Tissue-Engineered Medical Product Applications | Material - Scaffold/Matrix | Test method             | ASTM - F04.42 | 2018 | TEMP |
| ASTM F2150 - 19        | Standard Guide for Characterization and Testing of Biomaterial Scaffolds Used in Regenerative Medicine and Tissue-Engineered Medical Products                             | Material - Scaffold/Matrix | Test method             | ASTM - F04.42 | 2019 | TEMP |
| ASTM F2211 - 13        | Standard Classification for Tissue Engineered Medical Products (TEMPs)                                                                                                    | General                    | Classification          | ASTM - F04.41 | 2013 | TEMP |
| ASTM F2312 - 11        | Standard Terminology Relating to Tissue Engineered Medical Products                                                                                                       | General                    | Definition - Vocabulary | ASTM - F04.41 | 2011 | TEMP |
| ASTM F2315 - 18        | Standard Guide for Immobilization or Encapsulation of Living Cells or Tissue in Alginate Gels                                                                             | Material - Scaffold/Matrix | Test method             | ASTM - F04.43 | 2018 | TEMP |
| ASTM F2347 - 15        | Standard Guide for Characterization and Testing of Hyaluronan as Starting Materials Intended for Use in Biomedical and Tissue Engineered Medical Product Applications     | Material - Scaffold/Matrix | Test method             | ASTM - F04.42 | 2015 | TEMP |
| ASTM F3142 - 16        | Standard Guide for Evaluation of in vitro Release of Biomolecules from Biomaterials Scaffolds for TEMPs                                                                   | Analysis - Compounds       | Test method             | ASTM - F04.42 | 2016 | TEMP |
| ASTM F748 - 16         | Standard Practice for Selecting Generic Biological Test Methods for Materials and devices                                                                                 | Biocompatibility           | Test methods            | ASTM F04.16   | 2016 |      |
| EN 1012-1:2010         | Compressors and vacuum pumps — Safety requirements — Part 1: Air compressors                                                                                              | Device - Pump/Control unit | Requirements - Safety   | CEN/TC 232    | 2010 |      |
| EN 1012-2:1996+A1:2009 | Compressors and vacuum pumps — Safety requirements — Part 2: Vacuum pumps                                                                                                 | Device - Pump/Control unit | Requirements - Safety   | CEN/TC 232    | 2009 |      |
| EN 1032:2003+A1:2008   | Mechanical vibration — Testing of mobile machinery in order to determine the vibration emission value                                                                     | Device - Pump/Control unit | Test method             | CEN/TC 231    | 2008 |      |
| EN 12162:2001+A1:2009  | Liquid pumps — Safety requirements — Procedure for hydrostatic testing                                                                                                    | Device - Pump/Control unit | Test method             | CEN/TC 197    | 2009 |      |

| Journal Name          |                                                                                                                                                                 |                            |                              |            |      | ARTICLE |
|-----------------------|-----------------------------------------------------------------------------------------------------------------------------------------------------------------|----------------------------|------------------------------|------------|------|---------|
| EN 12322:1999/A1:2001 | In vitro diagnostic medical devices - Culture media for microbiology - Performance criteria for culture media                                                   | Material - Ancillary       | Requirements - Materials     | CEN/TC 140 | 2001 | IVD     |
| EN 13612:2002         | Performance evaluation of in vitro diagnostic medical devices                                                                                                   | Device - OoC               | Test method                  | CEN/TC 140 | 2002 | IVD     |
| EN 13641:2002         | Elimination or reduction of risk of infection related to in vitro diagnostic reagents                                                                           | Device - OoC               | Requirements - Safety        | CEN/TC 140 | 2002 | IVD     |
| EN 13975:2003         | Sampling procedures used for acceptance testing of in vitro diagnostic medical devices — Statistical aspects                                                    | Analysis                   | Test method                  | CEN/TC 140 | 2002 | IVD     |
| EN 14136:2004         | Use of external quality assessment schemes in the assessment of the performance of in vitro diagnostic examination procedures                                   | Quality                    | Requirements - Performance   | CEN/TC 140 | 2004 | IVD     |
| EN 1422:2014          | Sterilizers for medical purposes - Ethylene oxide sterilizers - Requirements and test methods                                                                   | Sterilization              | Requirements                 | CEN/TC 102 | 2014 |         |
| EN 285:2015           | Sterilization - Steam sterilizers - Large sterilizers                                                                                                           | Sterilization              | Requirements                 | CEN/TC 102 | 2015 |         |
| EN 556-1:2001         | Sterilization of medical devices - Requirements for medical devices to be designated "STERILE" - Part 1: Requirements for terminally sterilized medical devices | Sterilization              | Requirements - Final product | CEN/TC 204 | 2001 | MedDev  |
| EN 556-2:2015         | Sterilization of medical devices - Requirements for medical devices to be designated "STERILE" - Part 2: Requirements for aseptically processed medical devices | Sterilization              | Requirements - Final product | CEN/TC 204 | 2015 | MedDev  |
| EN 809:1998+A1:2009   | Pumps and pump units for liquids — Common safety requirements                                                                                                   | Device - Pump/Control unit | Requirements - Safety        | CEN/TC 197 | 2009 |         |
| GIVIMP                | Guidance Document on Good In Vitro Method Practices                                                                                                             | Best practice              | Best practice                | OECD       | 2018 |         |
| IEC 60519-1:2020      | Safety in installations for electroheating and electromagnetic processing - Part 1: General requirements                                                        | Device - Pump/Control unit | Requirements                 | IEC TC 27  | 2020 |         |
| ISO 10991 - 2009      | Micro process engineering - vocabulary                                                                                                                          | Device - OoC               | Definition - Vocabulary      | ISO/TC 48  | 2009 |         |
| ISO 10993:2012        | Biological evaluation of medical devices (all parts)                                                                                                            | Quality                    | Requirements - Performance   | ISO/TC 194 | 2012 | MedDev  |

## ARTICLE

## Journal Name

| ARTICLE          |                                                                                                                                                                                                             |                | Journal Name                 |                |      |        |
|------------------|-------------------------------------------------------------------------------------------------------------------------------------------------------------------------------------------------------------|----------------|------------------------------|----------------|------|--------|
| ISO 11135:2014   | Sterilization of health-care products — Ethylene oxide — Requirements for the development, validation and routine control of a sterilization process for medical devices                                    | Sterilization  | Requirements - Final product | ISO/TC 198     | 2014 | MedDev |
| ISO 11137-1:2006 | Sterilization of health care products — Radiation — Part 1: Requirements for development, validation and routine control of a sterilization process for medical devices                                     | Sterilization  | Requirements - Final product | ISO/TC 198     | 2006 | MedDev |
| ISO 11137-2:2013 | Sterilization of health care products — Radiation — Part 2: Establishing the sterilization dose                                                                                                             | Sterilization  | Test method                  | ISO/TC 198     | 2013 | MedDev |
| ISO 11138-1:2017 | Sterilization of health care products — Biological indicators (all parts)                                                                                                                                   | Sterilization  | Test method                  | ISO/TC 198     | 2017 | MedDev |
| ISO 11140-1:2014 | Sterilization of health care products — Chemical indicators (all parts)                                                                                                                                     | Sterilization  | Test method                  | ISO/TC 198     | 2014 | MedDev |
| ISO 11607-1:2019 | Packaging for terminally sterilized medical devices (all parts)                                                                                                                                             | Packaging      | Requirements - Final product | ISO/TC 198     | 2019 | MedDev |
| ISO 11737-1:2018 | Sterilization of health care products — Microbiological methods (all parts)                                                                                                                                 | Sterilization  | Test method                  | ISO/TC 198     | 2018 | MedDev |
| ISO 13408-1:2015 | Aseptic processing of health care products - all 7 parts                                                                                                                                                    | Sterilization  | Requirements - Final product | ISO/TC 198     | 2008 | MedDev |
| ISO 13485:2016   | Medical devices -Quality management systems -- Requirements for regulatory purposes                                                                                                                         | Quality        | Requirements - Performance   | ISO/TC 210     | 2016 | MedDev |
| ISO 14937:2009   | Sterilization of health care products — General requirements for characterization of a sterilizing agent and the development, validation and routine control of a sterilization process for medical devices | Sterilization  | Requirements - Final product | ISO/TC 198     | 2009 | MedDev |
| ISO 14971:2019   | Medical devices — Application of risk management to medical devices                                                                                                                                         | Quality        | Requirements - Performance   | ISO/TC 210     | 2019 | MedDev |
| ISO 1622-1:2012  | Plastics — Polystyrene (PS) moulding and extrusion materials - all parts                                                                                                                                    | Material - Ooc | Requirements                 | ISO/TC 61/SC 9 | 2012 |        |
| ISO 17665-1:2006 | Sterilization of health care products — Moist heat (all parts)                                                                                                                                              | Sterilization  | Test method                  | ISO/TC 198     | 2006 | MedDev |
| ISO 17855-1:2014 | Plastics — Polyethylene (PE) moulding and extrusion materials - all parts                                                                                                                                   | Material - Ooc | Requirements                 | ISO/TC 61/SC 9 | 2014 |        |
| ISO 18250-1:2018 | Medical devices — Connectors for reservoir delivery systems for healthcare applications — Part 1: General requirements and common test methods                                                              | Device - OoC   | Requirements - compatibility | ISO/TC 210     | 2018 | MedDev |

## Journal Name

## ARTICLE

|                     |                                                                                                                                          |                            |                              |                 |      |        |
|---------------------|------------------------------------------------------------------------------------------------------------------------------------------|----------------------------|------------------------------|-----------------|------|--------|
| ISO 18250-7:2018    | Medical devices — Connectors for reservoir delivery systems for healthcare applications — Part 7: Connectors for intravascular infusion  | Device - OoC               | Requirements - compatibility | ISO/TC 210      | 2018 | MedDev |
| ISO 19062-1:2015    | Plastics — Acrylonitrile-butadiene-styrene (ABS) moulding and extrusion materials - all parts                                            | Material - Ooc             | Requirements                 | ISO/TC 61/SC 9  | 2015 |        |
| ISO 19069-1:2015    | Plastics — Polypropylene (PP) moulding and extrusion materials - all parts                                                               | Material - Ooc             | Requirements                 | ISO/TC 61/SC 9  | 2015 |        |
| ISO 21305-1:2019    | Plastics — Polycarbonate (PC) moulding and extrusion materials                                                                           | Material - Ooc             | Requirements                 | ISO/TC 61/SC 9  | 2019 |        |
| ISO 2151:2004       | Acoustics — Noise test code for compressors and vacuum pumps — Engineering method (Grade 2)                                              | Device - Pump/Control unit | Test method                  | ISO/TC 118/SC 6 | 2004 |        |
| ISO 22442:2007      | Medical devices utilizing animal tissues and their derivatives (all parts)                                                               | Quality                    | Requirements - Final product | ISO/TC 194      | 2007 | MedDev |
| ISO 23640:2011      | In vitro diagnostic medical devices — Evaluation of stability of in vitro diagnostic reagents                                            | Material - Ancillary       | Test method                  | ISO/TC 212      | 2011 | IVD    |
| ISO 6009:2016       | Hypodermic needles for single use — Colour coding for identification                                                                     | Device - OoC               | Requirements                 | ISO/TC 84       | 2016 |        |
| ISO 7864:2016       | Sterile hypodermic needles for single use — Requirements and test methods                                                                | Device - OoC               | Test method                  | ISO/TC 84       | 2016 |        |
| ISO 7886-1:2017     | Sterile hypodermic syringes for single use (all parts)                                                                                   | Device - OoC               | Requirements                 | ISO/TC 84       | 2017 |        |
| ISO 80369-20:2015   | Small-bore connectors for liquids and gases in healthcare applications — Part 20: Common test methods                                    | Device - OoC               | Test method                  | ISO/TC 210      | 2015 |        |
| ISO 80369-7:2016    | Small-bore connectors for liquids and gases in healthcare applications — Part 7: Connectors for intravascular or hypodermic applications | Device - OoC               | Requirements - compatibility | ISO/TC 210      | 2016 |        |
| ISO 8257-1:1998     | Plastics — Poly(methyl methacrylate) (PMMA) moulding and extrusion materials - all parts                                                 | Material - Ooc             | Requirements                 | ISO/TC 61/SC 9  | 1998 |        |
| ISO 9626:2016       | Stainless steel needle tubing for the manufacture of medical devices — Requirements and test methods                                     | Device - OoC               | Test method                  | ISO/TC 84       | 2016 |        |
| ISO/IWA 23:2016(en) | Interoperability of microfluidic devices — Guidelines for pitch spacing dimensions and initial device classification                     | Device - OoC               | Requirements - compatibility | ISO/TMBG        | 2016 |        |
| ISO/TS 20399-1:2018 | Biotechnology — Ancillary materials present during the production of cellular therapeutic products — Part 1: General requirements        | Material - Ancillary       | Requirements - Materials     | ISO/TC 276      | 2018 | TEMP   |

## ARTICLE

## Journal Name

|                     |                                                                                                                                                                      |                      |                          |                                       |      |      |
|---------------------|----------------------------------------------------------------------------------------------------------------------------------------------------------------------|----------------------|--------------------------|---------------------------------------|------|------|
| ISO/TS 20399-2:2018 | Biotechnology – Ancillary materials present during the production of cellular therapeutic products – Part 2: Best practice guidance for ancillary material suppliers | Material - Ancillary | Test method              | ISO/TC 276                            | 2018 | TEMP |
| ISO/TS 20399-3:2018 | Biotechnology – Ancillary materials present during the production of cellular therapeutic products – Part 3: Best practice guidance for ancillary material users     | Material - Ancillary | Test method              | ISO/TC 276                            | 2018 | TEMP |
| USP <1024>          | Bovine Serum                                                                                                                                                         | Material - Ancillary | Reference Material       | USP                                   |      |      |
| USP <1043>          | Ancillary Materials for Cell, Gene, and Tissue-Engineered Products                                                                                                   | Material - Ancillary | Reference Material       | USP                                   |      |      |
| USP <89>            | Enzymes Used as Ancillary Materials in Pharmaceutical Manufacturing                                                                                                  | Material - Ancillary | Reference Material       | USP                                   |      |      |
| USP <90>            | Fetal Bovine Serum—Quality Attributes and Functionality Tests                                                                                                        | Material - Ancillary | Reference Material       | USP                                   |      |      |
| USP <92>            | Growth Factors and Cytokines Used in Cell Therapy Manufacturing                                                                                                      | Material - Ancillary | Reference Material       | USP                                   |      |      |
| Catalog #1084292    | CD34+ Cell Enumeration System Suitability (1.24 x 10 <sup>4</sup> cells) reference material                                                                          | Material - Ancillary | Reference Material       | USP                                   |      |      |
| Catalog #1148089    | Collagenase I (2 x 0.5ml) reference material                                                                                                                         | Material - Ancillary | Reference Material       | USP                                   |      |      |
| Catalog #1148090    | Collagenase II (2 x 0.5ml) reference material                                                                                                                        | Material - Ancillary | Reference Material       | USP                                   |      |      |
| Catalog #1270548    | Fetal Bovine Serum (10ml) reference material                                                                                                                         | Material - Ancillary | Reference Material       | USP                                   |      |      |
| Catalog #1311714    | rHuman IL-4 (51mcg) reference material                                                                                                                               | Material - Ancillary | Reference Material       | USP                                   |      |      |
| VDI 2017            | Medical Grade Plastics (MGP)                                                                                                                                         | Material - OoC       | Requirements - Materials | VDI Department of Plastics Technology | 2017 |      |
